# Supplementary material for: Contributions of Volunteer Community Mobilizers to Polio Eradication in Nigeria: The Experiences of Non-governmental and Civil Society Organizations
Source: PubMed Central journal article supplement (PMC6776094; doi:10.4269/ajtmh.19-0068), 2019-10
Supplement: tpmd190068.SD1.pdf [file tpmd190068.SD1.pdf]

# **Research Questionnaire for VCM Supervisors**

## **Letter of Consent**

Dear Sir/Madam,

I am a researcher working for Core Group Polio Project in Nigeria to assess the role and relevance of VCMs working with NGOs and CSOs, their performance, and their contributions to the Polio Eradication Initiative (PEI) in Nigeria.

I cordially invite you to contribute to our study by responding to the questions below. The questionnaire should take approximately 20 minutes to complete. Please feel at ease in providing your response. The information provided will be treated as confidential and used for this purpose only.

Thank you and best wishes.

Jane Francis Duru

20Accept to respond

Will not respond

**QUESTIONNAIRE ON THE CONTRIBUTIONS OF**  
**VOLUNTEER COMMUNITY MOBILIZERS (VCMs) TO POLIO ERADICATION IN**  
**NIGERIA**  
**For Ward Focal Persons - Supervisors**

**Name of State** \_\_\_\_\_

**A. VCM SELECTION/COMPOSITION/DEPLOYMENT**

1. Do you work with the Volunteer Community Mobilizers (VCMs) for the polio project?  
Yes                      No

10. Which methods did you use to garner community support and commitment for the project?

- Advocacy visits
- Social Mobilization
- Community forum
- Project Champions
- Others, pls list \_\_\_\_\_

---

2. Who were selected as Volunteer Community Mobilizers? (Tick as many as applied)

- Unemployed graduates
- Retired teachers
- Retired health workers
- Religious leaders
- Women leaders
- Opinion leaders
- Traditional leaders
- Others (Specify).....

3. What criteria were used in selecting them? (Tick as many as applied)

- Level of Education
  - Elementary 6, SSCE holder, OND/NCE holder, Graduate
- Residence in the community
- Respected in the community
- Speaking native language fluently
- Knowledge of Polio immunization
- Others (Specify).....

4. How many of the Volunteer Community Mobilizers (VCMs) are females and males?

• Female \_\_\_\_\_

• Males \_\_\_\_\_

5. Did the VCMs work in teams?

Yes                                  No

If yes how many persons per team?

.....

6. Were the VCMs trained before they started work as a community mobilizer?

Yes                                  No

If yes how many times were they trained?

.....

7. How many Communities/Households were assigned to each VCM team?

Communities \_\_\_\_\_ Households \_\_\_\_\_

8. How many hours did the VCMs work in a week?

• 2- 3hours

• 4 -6hours

• \_\_\_\_\_

13. Were the VCMs paid any stipend/allowance? (tick)

Yes                                  No

**B. SERVICES PROVIDED & METHODS USED BY VCMS**

9. What services did the VCMs render to the Communities? Tick as many as applied.

- House-to-house mobilisation for polio and routine immunization
- Conduct community based AFP surveillance
- Promote routine immunization
- Track the vaccination status of under-fives newborns and pregnant women
- Interpersonal counselling on immunization
- Identify and track chronically missed (unimmunized) children and non-compliant parents (parents refusal of oral polio vaccine)
- Data collection on immunization
- Health education on treatment of diarrhoea, prevention of malaria, breastfeeding, etc.
- Referral
- Others \_\_\_\_\_

---

---

---

11. Where did the VCMs deliver their messages?

- Households
- Village square
- Village meetings
- Churches/Mosques
- Schools
- Motor parks
- Markets
- Transit sites (such as major intersections, bus depots and train stations)
- Others, pls list \_\_\_\_\_

---

12. What methods were used in delivering messages?

- Radio advertising/ Jingles
- Awareness rising campaigns with traditional & religious leaders
- Word of mouth messages
- House –to- house visits
- Compound meetings
- Town criers
- IEC materials- posters, stickers, leaflets, etc.
- Short dramas
- Community meetings
- Others, pls list \_\_\_\_\_

---

14. Did the VCMs use behavioural change communication (BCC) tools to work? (tick)

Yes                      No

If yes, list the behavioural change communication tools they used to work in the communities?

1. \_\_\_\_\_
2. \_\_\_\_\_
3. \_\_\_\_\_

- 4. \_\_\_\_\_
- 5. \_\_\_\_\_

15. What issues were addressed in the behavioural change communication (BCC) tools you used (tick as many as applied)

- General knowledge of the vaccination program
- Importance of vaccination
- Oral Polio Vaccine (OPV) Safety
- Immunization population
- The dose to be administered
- The route of administration
- Social mobilization issues
- Others, pls list \_\_\_\_\_

---

---

16. What is the number of people the VCMs reached with social mobilization/health messages in their communities?

---

17. Number of under-five missed children seen and referred for immunization by the VCMs

---

18. What are the reasons for missed children during immunizations?

- 'Child absent'
- non-compliance
- Religious belief
- Refusal
- Others, specify

---

---

19. Did the VCMs work with the health facilities, traditional birth attendants, traditional healers, traditional leaders, and heads of households in your communities?

Yes                      No

If yes, how many times did they visit them?

| State | No of Visits to Health Facilities | No of Visits to Traditional Birth Attendants | No of Visits to Traditional Healers | No of Visits to Traditional Leaders | No of Visits to Households |
|-------|-----------------------------------|----------------------------------------------|-------------------------------------|-------------------------------------|----------------------------|
|       |                                   |                                              |                                     |                                     |                            |

20. Did you conduct health education talks in your communities?

Yes                      No

If yes, how many times did you conduct health talks in your communities?

---



---

21. Was the project monitored and evaluated?

Yes                      No

If yes by who?

- Project officers
- Community leaders
- LGA officials
- State officials

**C. PROJECT RELEVANCE & CONTRIBUTION**

22. What informed the use of Volunteer Community Mobilizers (VCMs) for polio eradication in your community?

---



---



---



---

23. What are the contributions of Volunteer Community Mobilizers towards the eradication of polio in Nigeria?

---

---

---

---

24. Why should the contributions of Volunteer Community Mobilizers to polio eradication be documented?

---

---

---

---

---

25. Any other useful information on the contributions of volunteer community mobilizers in polio eradication in Nigeria?

---

---

---

---

---

THANK YOU.

# **Research Questionnaire for State Coordinators**

## **Letter of Consent**

Dear Sir/Madam,

I am a researcher working for Core Group Polio Project in Nigeria to assess the role and relevance of VCMs working with NGOs and CSOs, their performance, and their contributions to the Polio Eradication Initiative (PEI) in Nigeria.

I cordially invite you to contribute to our study by responding to the questions below. The questionnaire should take approximately 20 minutes to complete. Please feel at ease in providing your response. The information provided will be treated as confidential and used for this purpose only.

Thank you and best wishes.

Jane Francis Duru

Accept to respond

Will not respond



**QUESTIONNAIRE ON THE CONTRIBUTIONS OF  
VOLUNTEER COMMUNITY MOBILIZERS (VCMs) TO POLIO ERADICATION IN  
NIGERIA  
For State Project Coordinators**

Name of State \_\_\_\_\_

**A. PROJECT LGAS/SUPPORT**

1. How many Volunteer Community Mobilizers (VCMs) were selected & trained for the project in your State? \_\_\_\_\_

2. List the LGAs selected in your State for the project and the no of VCMs assigned

| S/N | Names of LGA selected in the State | No of VCMs used per LGA |
|-----|------------------------------------|-------------------------|
|     |                                    |                         |
|     |                                    |                         |
|     |                                    |                         |
|     |                                    |                         |
|     |                                    |                         |
|     |                                    |                         |
|     |                                    |                         |
|     |                                    |                         |
|     |                                    |                         |
|     |                                    |                         |
|     |                                    |                         |

3. What were the criteria used in selecting the LGAs supported by the project?

---



---



---

4. Which methods were used to garner stakeholders support and commitment in your State?

- Advocacy visits
- Social Mobilization
- Community forum
- Project Champions
- Others, pls list \_\_\_\_\_

---

**B. VCM SELECTION/COMPOSITION/DEPLOYMENT**

5. Who were selected as Volunteer Community Mobilizers (VCMs) in your State for the project?

(Tick as many as applied)

- Unemployed graduates
- Retired teachers
- Retired health workers
- Religious leaders
- Women leaders
- Opinion leaders
- Traditional leaders
- Others (Specify).....

6. What criteria were used in selecting them? (Tick as many as applied)

- Level of Education
  - Elementary 6, SSCE holder, OND/NCE holder, Graduate
- Residence in the community
- Respected in the community
- Speaking native language fluently
- Knowledge of Polio immunization
- Others (Specify).....

7. How many of the Volunteer Community Mobilizers (VCMs) in your State are females and males?

- Female \_\_\_\_\_
- Males \_\_\_\_\_

8. How many trainings were organised for the VCMs in your state since the project inception and how many VCMS were trained?

| S/N | Title of the Training | No of Trainings Organised | No of VCMs that Attended |
|-----|-----------------------|---------------------------|--------------------------|
|     |                       |                           |                          |
|     |                       |                           |                          |
|     |                       |                           |                          |
|     |                       |                           |                          |
|     |                       |                           |                          |
|     |                       |                           |                          |
|     |                       |                           |                          |
|     |                       |                           |                          |
|     |                       |                           |                          |
|     | <b>Total</b>          |                           |                          |

9. How Households/Communities were assigned to each VCM team?

- Communities \_\_\_\_\_ Households \_\_\_\_\_

10. Did the VCMs work in teams?

Yes                                  No

If yes how many persons per team?

.....

11. How many hours did the VCMs work in a week?

- 2- 3hours
- 4 -6hours
- \_\_\_\_\_

12. Were the Volunteer Community Mobilizers (VCMs) paid stipend/allowance?

Yes                                  No

**C. SERVICES PROVIDED & METHODS USED BY VCMS**

13. What services were rendered by Volunteer Community Mobilizers (VCMs)? Tick as many as applied.

- House-to-house mobilisation for polio and routine immunization
- Community based AFP surveillance
- Promote routine immunization
- Track the vaccination status of under-fives newborns and pregnant women
- Interpersonal counselling on immunization
- Identify and track chronically missed (unimmunized) children and non-compliant parents (parents refusal of oral polio vaccine)
- Data collection on immunization
- Health education on treatment of diarrhoea, prevention of malaria, breastfeeding, etc.
- Referral
- Others \_\_\_\_\_

\_\_\_\_\_  
\_\_\_\_\_  
\_\_\_\_\_

14. Where did the VCMs deliver their messages?

- Households
- Village square
- Village meetings
- Churches/Mosques

- Schools
  - Motor parks
  - Markets
  - Transit sites (such as major intersections, bus depots and train stations)
  - Others, pls list \_\_\_\_\_
- 

15. What methods were used in delivering messages?

- Radio advertising/ Jingles
  - Awareness rising campaigns with traditional & religious leaders
  - Word of mouth messages
  - House –to- house visits
  - Compound meetings
  - Town criers/announcers
  - IEC materials- posters, stickers, leaflets, etc.
  - Short dramas
  - Community meetings
  - Convergent messaging
  - Others, pls list \_\_\_\_\_
- 

16. Did the VCMs use Behavioural Change Communication (BCC) tools to work? (tick)

Yes

No

If yes, list the Behavioural Change Communication tools they used to work in the communities?

6. \_\_\_\_\_
7. \_\_\_\_\_
8. \_\_\_\_\_
9. \_\_\_\_\_
10. \_\_\_\_\_

17. What issues were addressed in the Behavioural Change Communication (BCC) tools used by the VCMs? (tick as many as applied)

- General knowledge of the vaccination program
- Knowledge of key Household practices
- Importance of vaccination
- Oral Polio Vaccine (OPV) Safety

- Immunization population
  - The dose to be administered
  - The route of administration of common vaccines
  - Social mobilization issues
  - Prevention of common Health problems
  - Others, pls list \_\_\_\_\_
- 
- 

18. How many people were reached with social mobilization/health messages in the LGAs supported in your state by the VCMs since the project inception?

| S/N | Names of LGA selected in the State | No of People reached with social mobilization / health messages |
|-----|------------------------------------|-----------------------------------------------------------------|
|     |                                    |                                                                 |
|     |                                    |                                                                 |
|     |                                    |                                                                 |
|     |                                    |                                                                 |
|     |                                    |                                                                 |
|     |                                    |                                                                 |
|     |                                    |                                                                 |
|     |                                    |                                                                 |
|     |                                    |                                                                 |
|     |                                    |                                                                 |
|     |                                    |                                                                 |

19. Number of under-five missed children seen and referred for immunization since the project inception.

| S/N | Names of LGA selected in the State | No of under-five missed children seen and referred for immunization in the LGA |
|-----|------------------------------------|--------------------------------------------------------------------------------|
|     |                                    |                                                                                |
|     |                                    |                                                                                |
|     |                                    |                                                                                |
|     |                                    |                                                                                |
|     |                                    |                                                                                |
|     |                                    |                                                                                |
|     |                                    |                                                                                |
|     |                                    |                                                                                |
|     |                                    |                                                                                |
|     |                                    |                                                                                |
|     |                                    |                                                                                |

20. What are the reasons for missed children during immunizations?

- 'Child absent'
- non-compliance
- Religious belief
- Refusal
- Others, specify \_\_\_\_\_

---



---

21. Did the VCMs work with the health facilities, traditional birth attendants, traditional healers, traditional leaders, religious leaders and heads of households in their communities?

Yes                      No

If yes, how many times did they visit them since the project inception?

| Name of LGA  | No of Visits to Health Facilities | No of Visits to Traditional Birth Attendants | No of Visits to Traditional Healers | No of Visits to Traditional Leaders | No of Visits to Households |
|--------------|-----------------------------------|----------------------------------------------|-------------------------------------|-------------------------------------|----------------------------|
|              |                                   |                                              |                                     |                                     |                            |
|              |                                   |                                              |                                     |                                     |                            |
|              |                                   |                                              |                                     |                                     |                            |
|              |                                   |                                              |                                     |                                     |                            |
|              |                                   |                                              |                                     |                                     |                            |
|              |                                   |                                              |                                     |                                     |                            |
|              |                                   |                                              |                                     |                                     |                            |
|              |                                   |                                              |                                     |                                     |                            |
|              |                                   |                                              |                                     |                                     |                            |
|              |                                   |                                              |                                     |                                     |                            |
|              |                                   |                                              |                                     |                                     |                            |
| <b>Total</b> |                                   |                                              |                                     |                                     |                            |

22. Did the VCMs conduct health education talks in their communities?

Yes                      No

If yes, how many times did they conduct health talks in their communities in a week?

---

23. What are the objectives of polio communication interventions in Nigeria? Tick all that applies

- Advocacy

- Social mobilization
- Behavioural change communication

24. How did you supervise and monitor the activities of VCMs?

---

---

---

---

**D. PROJECT RELEVANCE & CONTRIBUTION**

25. When did CGPP start working in Nigeria..... and for how long now  
.....?

26. List other CGPP Implementing Partners that worked with you if different from above

---

---

---

27. List the CSOs/NGOs that worked with you in your State.

1. \_\_\_\_\_
2. \_\_\_\_\_
3. \_\_\_\_\_

28. What informed the use of Volunteer Community Mobilizers (VCMs) for polio eradication in your State?

---

---

---

---

29. What are the innovative strategies employed by the Volunteer Community Mobilizers for polio eradication in Nigeria?

---

---

---

---

30. What are the contributions of Volunteer Community Mobilizers towards the eradication of polio in Nigeria?

---

---

---

---

31. Is it necessary to document the contributions of Volunteer Community Mobilizers to polio eradication in Nigeria?

Yes                      No

If yes give reasons

---

---

---

---

---

32. Any other useful information on the contributions of volunteer community mobilizers in polio eradication in Nigeria?



---

---

---

---

---

THANK YOU.
